# Supplementary material for: LMS-based continuous reference percentiles for 14 laboratory parameters in the CALIPER cohort of healthy children and adolescents
Source: publisher site journal article supplement (doi:10.1515/cclm-2022-1077), 2023-01-14
Supplement: Supplementary file 1 [file j_cclm-2022-1077_suppl_002.docx]

| **Analyte** | **Units** | **Analytical Imprecision** | | | **LLOQ** | **Reference** |
| --- | --- | --- | --- | --- | --- | --- |
| **Control Level 1** Concentration  SD  CV (%) | **Control Level 2** Concentration  SD  CV (%) | **Control Level 3**  Concentration  SD  CV (%) |
| **Alanine Aminotransferase - Without Piridoxal Phosphate (ALT)** | U/L | 33 1.6 4.8 | 90 2.6 2.9 | --- | 7 | 35 |
| **Alkaline Phosphatase, 4-Nitrophenyl Phosphate (ALP)** | U/L | 119 7.1 6.0 | 434 9.9 2.3 | --- | 9 | 35 |
| **Cholesterol** | mmol/L | 6.45 0.186 2.9 | 2.89 0.084 3.1 | --- | 5 | 35 |
| **Creatinine (Jaffe)** | μmol/L | 127 3.7 3.0 | 579 12.4 2.1 | --- | 8.8 | 35 |
| **Creatinine (Enzymatic)** | μmol/L | 43 1.3 4.0 | 490 6.2 1.3 | --- | 8.8 | 35 |
| **Direct HDL-Cholesterol (UHDL)** | mmol/L | 1.51 0.039 2.6 | 0.69 0.21 3.0 | --- | 0.13 | 35 |
| **Estradiol** | pmol/L | 29.4  3.22  10.9 | 230.8  7.33  3.2 | 498.2  28.1  5.6 | -- | 34 |
| **Ferritin** | µg/L | 30.3  1.87  6.2 | 210.6  14.86  7.1 | 476.4  32.55  6.8 | -- | 33 |
| **FSH** | IU/L | 7.20  0.49  6.8 | 17.04  1.40  8.2 | 39.41  2.77  7.0 | -- | 34 |
| **Iron** | μmol/L | 31.0 1.21 3.9 | 5.1 0.45 8.9 | --- | 1.3 | 35 |
| **LH** | IU/L | 3.43  0.34  9.9 | 14.89  146  9.8 | 52.88  3.62  6.9 | 0.09 | 34 |
| **Testosterone** | nmol/L | 8.93  0.692  7.9 | 74.93  5.13  6.9 | 219.88  14.32  6.5 | 0.15 | 34 |
| **Triglycerides** | mmol/L | 1.37 0.057 4.1 | 5.02 0.064 1.3 | --- | 0.071 | 35 |
| **Vitamin B12** | pmol/L | 270.9  19.69  7.3 | 528.6  38.66  7.3 | 723.3  45.50  6.3 | 92.25 | 33 |
| **Vitamin D** | nmol/L | 18.1  1.81  10.0 | 37.0  2.64  7.1 | 74.2  4.44  6.0 | 6 | 33 |

**Supplemental Table 1.** Assay imprecision and LLOQ on the Abbott Architect.

LLOQ = lower limit of quantification.

SD = Standard deviation.

CV = Coefficient of variation.
