# Supplementary material for: LMS-based continuous reference percentiles for 14 laboratory parameters in the CALIPER cohort of healthy children and adolescents
Source: publisher site journal article supplement (doi:10.1515/cclm-2022-1077), 2023-01-14
Supplement: Supplementary file 2 [file j_cclm-2022-1077_suppl_003.docx]

**Supplemental Table 2.** Statistical LMS parameters used to calculate analyte-specific continuous reference percentiles:

| **Analyte** | **Gender** | **GAMLSS R code statement** |
| --- | --- | --- |
| **ALP** | M | gamlss(hormone~cs(age, df=2), sigma.fo=~cs(age, df=2), nu.fo=~cs(age, df=2), family=BCCG, data=d) |
| F | gamlss(hormone~cs(age, df=2), sigma.fo=~cs(age, df=2), nu.fo=~cs(age, df=2), family=BCCG, data=d) |
| **ALT** | M | gamlss(hormone~cs(age, df=2), sigma.fo=~cs(age, df=0), nu.fo=~cs(age, df=0), family=BCCG, data=d) |
| F | gamlss(hormone~cs(age, df=2), sigma.fo=~cs(age, df=0), nu.fo=~cs(age, df=0), family=BCCG, data=d) |
| **Cholesterol** | Both | gamlss(hormone~cs(age, df=1), sigma.fo=~cs(age, df=0), nu.fo=~cs(age, df=0), family=BCCG, data=d) |
| **Creatinine** | M | gamlss(hormone~cs(age, df=1), sigma.fo=~cs(age, df=1), nu.fo=~cs(age, df=1), family=BCCG, data=d) |
| F | gamlss(hormone~cs(age, df=1), sigma.fo=~cs(age, df=1), nu.fo=~cs(age, df=1), family=BCCG, data=d) |
| **Estradiol** | M | gamlss(hormone~cs(age, df=2), family=BCCG, data=d) |
| F | gamlss(hormone~cs(age, df=1), family=BCCGo, data=d) |
| **Ferritin** | M | gamlss(hormone~cs(age, df=3), sigma.fo=~cs(age, df=2), nu.fo=~cs(age, df=2), family=BCCG, data=d) |
| F | gamlss(hormone~cs(age, df=2), sigma.fo=~cs(age, df=0), nu.fo=~cs(age, df=0), family=BCCG, data=d) |
| **FSH** | M | gamlss(hormone~cs(age, df=3), sigma.fo=~cs(age, df=2), nu.fo=~cs(age, df=2), family=BCCG, data=d) |
| F | gamlss(hormone~cs(age, df=2), sigma.fo=~cs(age, df=0), nu.fo=~cs(age, df=0), family=BCCG, data=d) |
| **HDL** | M | gamlss(hormone~cs(age, df=1), sigma.fo=~cs(age, df=1), nu.fo=~cs(age, df=1), family=BCCG, data=d) |
| F | gamlss(hormone~cs(age, df=1), sigma.fo=~cs(age, df=1), nu.fo=~cs(age, df=1), family=BCCG, data=d) |
| **Iron** | M | gamlss(hormone~cs(age, df=1), sigma.fo=~cs(age, df=0), nu.fo=~cs(age, df=0), family=BCCG, data=d) |
| F | gamlss(hormone~cs(age, df=1), sigma.fo=~cs(age, df=0), nu.fo=~cs(age, df=0), family=BCCG, data=d) |
| **LH** | M | gamlss(hormone~cs(age, df=2), sigma.fo=~cs(age, df=1), family=BCCG, data=d) |
| F | gamlss(hormone~cs(age, df=2), sigma.fo=~cs(age, df=1), family=BCCG, data=d) |
| **TG** | Both | gamlss(hormone~cs(age, df=1), sigma.fo=~cs(age, df=0), nu.fo=~cs(age, df=0), family=BCCG, data=d) |
| **Vitamin B12** | Both | gamlss(hormone~cs(age, df=3), sigma.fo=~cs(age, df=2), nu.fo=~cs(age, df=2), family=BCCG, data=d) |
| **Vitamin D** | Both | gamlss(hormone~cs(age, df=2), sigma.fo=~cs(age, df=0), nu.fo=~cs(age, df=0), family=BCCG, data=d) |

ALP, alkaline phosphatase; ALT, alanine aminotransferase; F, female; FSH, follicle-stimulating hormone; HDL, high-density lipoprotein cholesterol; LH, luteinizing hormone; M, males; TG, triglycerides.
