# Supplementary material for: LMS-based continuous reference percentiles for 14 laboratory parameters in the CALIPER cohort of healthy children and adolescents
Source: publisher site journal article supplement (doi:10.1515/cclm-2022-1077), 2023-01-14
Supplement: Supplementary file 3 [file j_cclm-2022-1077_suppl_004.xlsx]

## Sheet: ALP_F
Supplemental Table 3. LMS models (LMS-for-age) for 14 clinical biomarkers in males and females separately or combined.
age	L	M	S
1	-0.214057	239.766	0.234088
1.1	-0.206532	239.929	0.233217
1.2	-0.199009	240.092	0.232348
1.3	-0.191487	240.255	0.231483
1.4	-0.183967	240.418	0.23062
1.5	-0.176459	240.582	0.229759
1.6	-0.168976	240.746	0.228903
1.7	-0.161538	240.911	0.228051
1.8	-0.15417	241.077	0.227205
1.9	-0.146898	241.246	0.226366
2	-0.139746	241.417	0.225535
2.1	-0.132741	241.591	0.224713
2.2	-0.125909	241.769	0.223901
2.3	-0.119274	241.95	0.223099
2.4	-0.112858	242.136	0.222307
2.5	-0.106686	242.327	0.221525
2.6	-0.10078	242.524	0.220755
2.7	-0.095165	242.725	0.219995
2.8	-0.0898655	242.933	0.219246
2.9	-0.0849043	243.147	0.21851
3	-0.0803047	243.368	0.217785
3.1	-0.0760899	243.596	0.217073
3.2	-0.07228	243.83	0.216374
3.3	-0.0688914	244.072	0.215689
3.4	-0.065932	244.322	0.21502
3.5	-0.0634082	244.578	0.214368
3.6	-0.0613281	244.841	0.213735
3.7	-0.059702	245.111	0.213122
3.8	-0.0585414	245.387	0.212529
3.9	-0.0578566	245.669	0.211959
4	-0.0576566	245.956	0.211412
4.1	-0.0579488	246.249	0.21089
4.2	-0.058728	246.546	0.210397
4.3	-0.0599757	246.848	0.209935
4.4	-0.0616707	247.152	0.209507
4.5	-0.0637922	247.458	0.209117
4.6	-0.0663182	247.765	0.208768
4.7	-0.0692271	248.072	0.208462
4.8	-0.0724985	248.379	0.208203
4.9	-0.076114	248.684	0.207993
5	-0.0800577	248.986	0.207835
5.1	-0.0843166	249.284	0.207731
5.2	-0.0888789	249.577	0.207683
5.3	-0.0937355	249.864	0.207692
5.4	-0.0988792	250.143	0.207759
5.5	-0.104303	250.413	0.207886
5.6	-0.109995	250.674	0.208075
5.7	-0.115943	250.923	0.208326
5.8	-0.122134	251.16	0.208639
5.9	-0.128555	251.383	0.209018
6	-0.135194	251.591	0.209461
6.1	-0.142032	251.784	0.209971
6.2	-0.149053	251.96	0.210547
6.3	-0.15624	252.117	0.211192
6.4	-0.163577	252.255	0.211905
6.5	-0.171049	252.373	0.212687
6.6	-0.178641	252.468	0.213537
6.7	-0.186335	252.541	0.214457
6.8	-0.19412	252.589	0.215446
6.9	-0.201982	252.611	0.216505
7	-0.209906	252.607	0.217633
7.1	-0.217878	252.574	0.218831
7.2	-0.225885	252.512	0.220099
7.3	-0.233913	252.419	0.221435
7.4	-0.241949	252.294	0.22284
7.5	-0.249982	252.136	0.224312
7.6	-0.257992	251.943	0.22585
7.7	-0.265964	251.714	0.227454
7.8	-0.273879	251.449	0.229122
7.9	-0.281721	251.146	0.230853
8	-0.289475	250.804	0.232646
8.1	-0.297127	250.421	0.2345
8.2	-0.304664	249.997	0.236413
8.3	-0.312074	249.53	0.238384
8.4	-0.31935	249.02	0.24041
8.5	-0.326482	248.466	0.242491
8.6	-0.33346	247.866	0.244624
8.7	-0.340273	247.22	0.246809
8.8	-0.34691	246.528	0.249045
8.9	-0.353355	245.787	0.251328
9	-0.359591	244.998	0.253658
9.1	-0.365601	244.16	0.256031
9.2	-0.371367	243.272	0.258444
9.3	-0.376863	242.334	0.260893
9.4	-0.382064	241.344	0.263376
9.5	-0.386941	240.303	0.265888
9.6	-0.39146	239.21	0.268426
9.7	-0.395593	238.064	0.270986
9.8	-0.399315	236.865	0.273563
9.9	-0.402599	235.612	0.276153
10	-0.405423	234.306	0.278751
10.1	-0.407763	232.945	0.281351
10.2	-0.409591	231.531	0.283948
10.3	-0.410872	230.062	0.286536
10.4	-0.411567	228.54	0.289105
10.5	-0.411644	226.963	0.291651
10.6	-0.411076	225.334	0.294165
10.7	-0.409838	223.651	0.296641
10.8	-0.407907	221.916	0.299072
10.9	-0.405263	220.129	0.301452
11	-0.401893	218.29	0.303774
11.1	-0.397781	216.401	0.306031
11.2	-0.392904	214.461	0.308216
11.3	-0.387232	212.473	0.310321
11.4	-0.380745	210.436	0.312339
11.5	-0.373428	208.353	0.314264
11.6	-0.365267	206.224	0.316089
11.7	-0.356248	204.05	0.317805
11.8	-0.346358	201.834	0.319404
11.9	-0.335585	199.576	0.320879
12	-0.323932	197.278	0.322222
12.1	-0.311399	194.941	0.323426
12.2	-0.297985	192.567	0.324483
12.3	-0.283689	190.158	0.325386
12.4	-0.268509	187.715	0.326129
12.5	-0.252437	185.24	0.326704
12.6	-0.235467	182.736	0.327107
12.7	-0.217621	180.204	0.327335
12.8	-0.198943	177.647	0.327385
12.9	-0.179486	175.068	0.327259
13	-0.159307	172.471	0.326955
13.1	-0.138459	169.857	0.326475
13.2	-0.116991	167.229	0.32582
13.3	-0.0949551	164.592	0.324991
13.4	-0.0723999	161.946	0.323989
13.5	-0.0493672	159.295	0.322815
13.6	-0.025898	156.642	0.321471
13.7	-0.00203424	153.988	0.319959
13.8	0.0221747	151.337	0.318282
13.9	0.0466836	148.691	0.316442
14	0.0714542	146.054	0.314444
14.1	0.0964427	143.429	0.312293
14.2	0.1216	140.817	0.309993
14.3	0.146872	138.222	0.30755
14.4	0.172218	135.647	0.304968
14.5	0.197613	133.095	0.302255
14.6	0.223037	130.568	0.299417
14.7	0.248481	128.07	0.296464
14.8	0.273931	125.602	0.293403
14.9	0.299372	123.169	0.290242
15	0.32479	120.771	0.286993
15.1	0.350173	118.411	0.283664
15.2	0.375513	116.092	0.280265
15.3	0.400797	113.813	0.276806
15.4	0.426015	111.578	0.273297
15.5	0.451162	109.386	0.269747
15.6	0.476231	107.24	0.266165
15.7	0.501213	105.14	0.262559
15.8	0.526099	103.087	0.258936
15.9	0.55088	101.082	0.255305
16	0.575554	99.1255	0.251671
16.1	0.600112	97.2175	0.248044
16.2	0.624542	95.3582	0.244428
16.3	0.648825	93.5473	0.24083
16.4	0.672936	91.7838	0.237254
16.5	0.696853	90.0664	0.233704
16.6	0.720576	88.3931	0.230186
16.7	0.744106	86.762	0.226701
16.8	0.767445	85.171	0.223255
16.9	0.7906	83.6179	0.219849
17	0.813574	82.1009	0.216487
17.1	0.836374	80.618	0.21317
17.2	0.859008	79.1675	0.209898
17.3	0.881488	77.7475	0.206674
17.4	0.903829	76.3558	0.203498
17.5	0.926045	74.9902	0.200369
17.6	0.948148	73.6483	0.197289
17.7	0.970149	72.3279	0.194258
17.8	0.992062	71.0265	0.191275
17.9	1.0139	69.7418	0.18834
18	1.03567	68.4713	0.185452
18.1	1.0574	67.2128	0.18261
18.2	1.0791	65.9641	0.179814
18.3	1.10076	64.723	0.177063
18.4	1.12241	63.4873	0.174356
18.5	1.14405	62.2549	0.171692
18.6	1.16569	61.0241	0.169068
18.7	1.18734	59.7941	0.166484
18.8	1.20898	58.5646	0.16394
18.9	1.23063	57.3351	0.161435
19	1.25227	56.1056	0.158968

## Sheet: ALP_M
age	L	M	S
1	0.84663	260.819	0.225917
1.1	0.839023	260.383	0.225489
1.2	0.83141	259.947	0.225062
1.3	0.823784	259.51	0.224636
1.4	0.816134	259.074	0.224213
1.5	0.808451	258.639	0.223791
1.6	0.800725	258.204	0.223371
1.7	0.792946	257.77	0.222953
1.8	0.785107	257.337	0.222537
1.9	0.777224	256.907	0.222126
2	0.769317	256.479	0.22172
2.1	0.761405	256.054	0.221321
2.2	0.753509	255.632	0.22093
2.3	0.745645	255.214	0.220546
2.4	0.737826	254.801	0.22017
2.5	0.730067	254.393	0.219801
2.6	0.722381	253.99	0.219438
2.7	0.714781	253.592	0.219083
2.8	0.707283	253.201	0.218734
2.9	0.699898	252.818	0.218391
3	0.692633	252.441	0.218055
3.1	0.685491	252.074	0.217727
3.2	0.678481	251.716	0.217406
3.3	0.671623	251.369	0.217094
3.4	0.664938	251.033	0.21679
3.5	0.658443	250.71	0.216497
3.6	0.652156	250.401	0.216215
3.7	0.646093	250.106	0.215945
3.8	0.640272	249.828	0.21569
3.9	0.634703	249.566	0.215449
4	0.629394	249.322	0.215227
4.1	0.624352	249.096	0.215023
4.2	0.619572	248.891	0.214841
4.3	0.615045	248.706	0.214682
4.4	0.610762	248.542	0.214547
4.5	0.606711	248.401	0.214438
4.6	0.602883	248.282	0.214357
4.7	0.599271	248.185	0.214304
4.8	0.595862	248.112	0.214281
4.9	0.592646	248.061	0.214289
5	0.589614	248.033	0.214327
5.1	0.586754	248.028	0.214397
5.2	0.584051	248.046	0.2145
5.3	0.581489	248.088	0.214635
5.4	0.579054	248.152	0.214804
5.5	0.576729	248.238	0.215006
5.6	0.5745	248.346	0.215243
5.7	0.572353	248.475	0.215514
5.8	0.570272	248.625	0.21582
5.9	0.568241	248.795	0.216161
6	0.566243	248.985	0.216538
6.1	0.56426	249.194	0.21695
6.2	0.562273	249.422	0.2174
6.3	0.560276	249.668	0.217886
6.4	0.558261	249.931	0.218411
6.5	0.556222	250.21	0.218975
6.6	0.554148	250.505	0.219581
6.7	0.552024	250.814	0.220228
6.8	0.549833	251.138	0.220918
6.9	0.547558	251.474	0.221653
7	0.545176	251.823	0.222433
7.1	0.542665	252.184	0.223258
7.2	0.540001	252.555	0.22413
7.3	0.537165	252.936	0.22505
7.4	0.534136	253.324	0.226016
7.5	0.530889	253.718	0.227028
7.6	0.527401	254.117	0.228086
7.7	0.523649	254.52	0.229188
7.8	0.519608	254.925	0.230335
7.9	0.515265	255.331	0.231524
8	0.51061	255.737	0.232758
8.1	0.505634	256.14	0.234035
8.2	0.500325	256.541	0.235357
8.3	0.494677	256.938	0.236723
8.4	0.488683	257.328	0.238134
8.5	0.482344	257.712	0.239589
8.6	0.475659	258.087	0.241088
8.7	0.468629	258.452	0.242631
8.8	0.461248	258.806	0.244216
8.9	0.453511	259.147	0.245844
9	0.44541	259.475	0.247515
9.1	0.436936	259.788	0.249228
9.2	0.428084	260.085	0.250983
9.3	0.418843	260.366	0.252779
9.4	0.409208	260.628	0.254616
9.5	0.399189	260.871	0.256495
9.6	0.388795	261.095	0.258415
9.7	0.378034	261.296	0.260377
9.8	0.366906	261.475	0.26238
9.9	0.355414	261.629	0.264423
10	0.343558	261.757	0.266506
10.1	0.331337	261.857	0.268626
10.2	0.318749	261.929	0.270783
10.3	0.305794	261.969	0.272975
10.4	0.292472	261.977	0.275199
10.5	0.27878	261.952	0.277452
10.6	0.264717	261.891	0.279731
10.7	0.250282	261.792	0.282032
10.8	0.235477	261.655	0.28435
10.9	0.220325	261.476	0.286683
11	0.204854	261.253	0.289026
11.1	0.189098	260.985	0.291377
11.2	0.173094	260.669	0.293732
11.3	0.156875	260.301	0.296089
11.4	0.140468	259.882	0.298444
11.5	0.123905	259.408	0.300794
11.6	0.107211	258.878	0.303137
11.7	0.0904079	258.289	0.305469
11.8	0.0735189	257.641	0.307786
11.9	0.056568	256.931	0.310083
12	0.0395786	256.158	0.312355
12.1	0.0225746	255.32	0.314597
12.2	0.00558106	254.415	0.316802
12.3	-0.0113749	253.442	0.318964
12.4	-0.0282672	252.399	0.321078
12.5	-0.0450738	251.285	0.323136
12.6	-0.0617716	250.099	0.325133
12.7	-0.0783403	248.839	0.327063
12.8	-0.0947643	247.504	0.328921
12.9	-0.111028	246.094	0.330701
13	-0.127115	244.608	0.3324
13.1	-0.143007	243.045	0.334011
13.2	-0.15869	241.405	0.335532
13.3	-0.174162	239.687	0.336957
13.4	-0.189429	237.892	0.338285
13.5	-0.204491	236.02	0.339513
13.6	-0.219347	234.07	0.340638
13.7	-0.233999	232.045	0.341657
13.8	-0.248456	229.943	0.342568
13.9	-0.262729	227.765	0.343369
14	-0.276835	225.514	0.34406
14.1	-0.2908	223.19	0.344643
14.2	-0.304649	220.795	0.345119
14.3	-0.318402	218.331	0.34549
14.4	-0.332084	215.8	0.345758
14.5	-0.345712	213.204	0.345924
14.6	-0.359293	210.545	0.34599
14.7	-0.372811	207.826	0.345958
14.8	-0.386245	205.049	0.345832
14.9	-0.399579	202.217	0.345614
15	-0.412801	199.332	0.345307
15.1	-0.425905	196.396	0.344914
15.2	-0.438885	193.413	0.344438
15.3	-0.451735	190.385	0.343881
15.4	-0.464442	187.314	0.343246
15.5	-0.476996	184.204	0.342534
15.6	-0.489389	181.058	0.341748
15.7	-0.501616	177.877	0.340891
15.8	-0.513678	174.666	0.339965
15.9	-0.525574	171.425	0.338971
16	-0.537307	168.159	0.337914
16.1	-0.548874	164.869	0.336795
16.2	-0.560274	161.558	0.335617
16.3	-0.571507	158.228	0.334382
16.4	-0.582582	154.884	0.333094
16.5	-0.593517	151.527	0.331755
16.6	-0.604344	148.16	0.33037
16.7	-0.615098	144.787	0.328943
16.8	-0.625808	141.409	0.327476
16.9	-0.6365	138.031	0.325974
17	-0.647198	134.653	0.32444
17.1	-0.657925	131.279	0.322876
17.2	-0.668698	127.912	0.321285
17.3	-0.679521	124.552	0.31967
17.4	-0.690402	121.2	0.318033
17.5	-0.701346	117.858	0.316379
17.6	-0.712355	114.525	0.31471
17.7	-0.723426	111.2	0.31303
17.8	-0.734553	107.883	0.311343
17.9	-0.74573	104.572	0.309653
18	-0.756947	101.268	0.307963
18.1	-0.768193	97.9696	0.306275
18.2	-0.779458	94.6759	0.304593
18.3	-0.790734	91.386	0.302918
18.4	-0.802015	88.0991	0.301251
18.5	-0.813297	84.8142	0.299594
18.6	-0.82458	81.5306	0.297946
18.7	-0.835864	78.2478	0.296307
18.8	-0.847148	74.9654	0.294677
18.9	-0.858433	71.6831	0.293055
19	-0.869718	68.4008	0.291443

## Sheet: ALT_F
age	L	M	S
1	0.237546	16.4009	0.248086
1.1	0.237024	16.3775	0.248108
1.2	0.236502	16.3541	0.248129
1.3	0.235979	16.3308	0.248151
1.4	0.235457	16.3075	0.248173
1.5	0.234935	16.2843	0.248195
1.6	0.234413	16.2613	0.248216
1.7	0.23389	16.2385	0.248238
1.8	0.233368	16.2159	0.24826
1.9	0.232845	16.1937	0.248282
2	0.232323	16.1719	0.248304
2.1	0.2318	16.1505	0.248325
2.2	0.231277	16.1295	0.248347
2.3	0.230755	16.1091	0.248369
2.4	0.230232	16.0893	0.248391
2.5	0.229709	16.0702	0.248413
2.6	0.229186	16.0517	0.248435
2.7	0.228662	16.034	0.248456
2.8	0.228139	16.0171	0.248478
2.9	0.227616	16.0011	0.2485
3	0.227092	15.986	0.248522
3.1	0.226568	15.9718	0.248544
3.2	0.226044	15.9586	0.248566
3.3	0.22552	15.9465	0.248588
3.4	0.224996	15.9353	0.24861
3.5	0.224472	15.9252	0.248632
3.6	0.223947	15.9161	0.248654
3.7	0.223423	15.908	0.248676
3.8	0.222898	15.9009	0.248698
3.9	0.222373	15.8948	0.24872
4	0.221848	15.8896	0.248742
4.1	0.221323	15.8852	0.248764
4.2	0.220797	15.8818	0.248786
4.3	0.220272	15.8793	0.248808
4.4	0.219746	15.8776	0.24883
4.5	0.21922	15.8767	0.248852
4.6	0.218695	15.8764	0.248875
4.7	0.218169	15.8769	0.248897
4.8	0.217643	15.8779	0.248919
4.9	0.217117	15.8794	0.248942
5	0.216591	15.8814	0.248964
5.1	0.216065	15.8836	0.248987
5.2	0.215539	15.886	0.249009
5.3	0.215013	15.8886	0.249032
5.4	0.214487	15.8912	0.249054
5.5	0.213962	15.8938	0.249077
5.6	0.213436	15.8963	0.249099
5.7	0.21291	15.8987	0.249122
5.8	0.212385	15.9008	0.249145
5.9	0.211859	15.9027	0.249168
6	0.211334	15.9042	0.249191
6.1	0.210808	15.9054	0.249214
6.2	0.210283	15.9062	0.249237
6.3	0.209758	15.9065	0.24926
6.4	0.209233	15.9064	0.249283
6.5	0.208708	15.9057	0.249306
6.6	0.208183	15.9044	0.24933
6.7	0.207659	15.9026	0.249353
6.8	0.207134	15.9002	0.249376
6.9	0.20661	15.8971	0.2494
7	0.206086	15.8933	0.249424
7.1	0.205562	15.8888	0.249447
7.2	0.205039	15.8835	0.249471
7.3	0.204515	15.8776	0.249495
7.4	0.203992	15.8708	0.249519
7.5	0.203469	15.8633	0.249543
7.6	0.202947	15.855	0.249567
7.7	0.202424	15.8458	0.249591
7.8	0.201902	15.8357	0.249615
7.9	0.20138	15.8246	0.249639
8	0.200858	15.8126	0.249663
8.1	0.200337	15.7995	0.249688
8.2	0.199816	15.7855	0.249712
8.3	0.199295	15.7703	0.249737
8.4	0.198775	15.7541	0.249762
8.5	0.198255	15.7368	0.249786
8.6	0.197735	15.7185	0.249811
8.7	0.197216	15.699	0.249836
8.8	0.196697	15.6784	0.249861
8.9	0.196178	15.6566	0.249886
9	0.19566	15.6337	0.249911
9.1	0.195142	15.6096	0.249936
9.2	0.194625	15.5842	0.249962
9.3	0.194108	15.5576	0.249987
9.4	0.193591	15.5298	0.250012
9.5	0.193075	15.5006	0.250038
9.6	0.192559	15.4703	0.250064
9.7	0.192044	15.4386	0.250089
9.8	0.191529	15.4057	0.250115
9.9	0.191015	15.3716	0.250141
10	0.190501	15.3362	0.250167
10.1	0.189988	15.2996	0.250193
10.2	0.189475	15.2619	0.250219
10.3	0.188962	15.2231	0.250246
10.4	0.18845	15.1832	0.250272
10.5	0.187939	15.1423	0.250298
10.6	0.187427	15.1005	0.250325
10.7	0.186917	15.0577	0.250352
10.8	0.186407	15.0142	0.250378
10.9	0.185897	14.9699	0.250405
11	0.185388	14.9249	0.250432
11.1	0.184879	14.8793	0.250459
11.2	0.184371	14.8331	0.250486
11.3	0.183863	14.7864	0.250514
11.4	0.183355	14.7393	0.250541
11.5	0.182848	14.6917	0.250568
11.6	0.182342	14.6438	0.250596
11.7	0.181836	14.5957	0.250624
11.8	0.18133	14.5475	0.250651
11.9	0.180825	14.4991	0.250679
12	0.18032	14.4508	0.250707
12.1	0.179816	14.4025	0.250735
12.2	0.179312	14.3545	0.250764
12.3	0.178809	14.3067	0.250792
12.4	0.178306	14.2593	0.25082
12.5	0.177804	14.2122	0.250849
12.6	0.177302	14.1657	0.250877
12.7	0.176801	14.1199	0.250906
12.8	0.1763	14.0747	0.250935
12.9	0.1758	14.0304	0.250964
13	0.1753	13.987	0.250993
13.1	0.174801	13.9446	0.251022
13.2	0.174302	13.9033	0.251052
13.3	0.173804	13.8631	0.251081
13.4	0.173306	13.8241	0.25111
13.5	0.172809	13.7863	0.25114
13.6	0.172312	13.7499	0.25117
13.7	0.171816	13.7148	0.251199
13.8	0.17132	13.681	0.251229
13.9	0.170825	13.6487	0.251259
14	0.170331	13.6177	0.251289
14.1	0.169837	13.5881	0.25132
14.2	0.169343	13.5599	0.25135
14.3	0.16885	13.5331	0.25138
14.4	0.168358	13.5076	0.25141
14.5	0.167866	13.4834	0.251441
14.6	0.167375	13.4606	0.251471
14.7	0.166884	13.4391	0.251502
14.8	0.166393	13.4189	0.251533
14.9	0.165903	13.3999	0.251563
15	0.165414	13.3822	0.251594
15.1	0.164925	13.3657	0.251625
15.2	0.164437	13.3502	0.251656
15.3	0.163949	13.3359	0.251687
15.4	0.163461	13.3225	0.251718
15.5	0.162974	13.3101	0.251749
15.6	0.162487	13.2986	0.25178
15.7	0.162001	13.288	0.251811
15.8	0.161516	13.2782	0.251842
15.9	0.16103	13.2692	0.251874
16	0.160545	13.2609	0.251905
16.1	0.160061	13.2531	0.251936
16.2	0.159576	13.246	0.251967
16.3	0.159093	13.2394	0.251999
16.4	0.158609	13.2333	0.25203
16.5	0.158126	13.2276	0.252061
16.6	0.157642	13.2223	0.252093
16.7	0.15716	13.2173	0.252124
16.8	0.156677	13.2126	0.252155
16.9	0.156195	13.2081	0.252187
17	0.155713	13.2037	0.252218
17.1	0.155231	13.1995	0.252249
17.2	0.154749	13.1955	0.252281
17.3	0.154268	13.1915	0.252312
17.4	0.153786	13.1877	0.252343
17.5	0.153305	13.184	0.252374
17.6	0.152824	13.1805	0.252406
17.7	0.152343	13.177	0.252437
17.8	0.151862	13.1738	0.252468
17.9	0.151382	13.1707	0.2525
18	0.150901	13.1677	0.252531
18.1	0.15042	13.1648	0.252562
18.2	0.149939	13.1621	0.252594
18.3	0.149458	13.1593	0.252625
18.4	0.148978	13.1566	0.252656
18.5	0.148497	13.1539	0.252688
18.6	0.148016	13.1513	0.252719
18.7	0.147535	13.1486	0.25275
18.8	0.147055	13.146	0.252782
18.9	0.146574	13.1433	0.252813
19	0.146093	13.1407	0.252844

## Sheet: ALT_M
age	L	M	S
1	-0.0830329	17.3151	0.219255
1.1	-0.0800377	17.2736	0.219429
1.2	-0.0770425	17.2322	0.219604
1.3	-0.0740473	17.1907	0.219778
1.4	-0.0710522	17.1493	0.219953
1.5	-0.0680571	17.1079	0.220127
1.6	-0.065062	17.0666	0.220302
1.7	-0.062067	17.0255	0.220477
1.8	-0.0590721	16.9845	0.220652
1.9	-0.0560772	16.9437	0.220828
2	-0.0530825	16.9031	0.221003
2.1	-0.0500877	16.8628	0.221178
2.2	-0.0470931	16.8228	0.221354
2.3	-0.0440985	16.7831	0.22153
2.4	-0.041104	16.7438	0.221706
2.5	-0.0381095	16.7048	0.221882
2.6	-0.035115	16.6662	0.222058
2.7	-0.0321205	16.6281	0.222235
2.8	-0.029126	16.5904	0.222412
2.9	-0.0261314	16.5533	0.222588
3	-0.0231368	16.5166	0.222765
3.1	-0.0201422	16.4805	0.222943
3.2	-0.0171475	16.4451	0.22312
3.3	-0.0141526	16.4103	0.223298
3.4	-0.0111575	16.3761	0.223475
3.5	-0.00816227	16.3426	0.223653
3.6	-0.00516674	16.3099	0.223831
3.7	-0.00217091	16.2778	0.22401
3.8	0.000825265	16.2465	0.224188
3.9	0.00382183	16.2159	0.224367
4	0.00681881	16.1862	0.224546
4.1	0.00981625	16.1573	0.224725
4.2	0.0128142	16.1292	0.224904
4.3	0.0158127	16.1019	0.225084
4.4	0.0188119	16.0754	0.225264
4.5	0.0218118	16.0497	0.225444
4.6	0.0248125	16.0248	0.225624
4.7	0.0278141	16.0007	0.225804
4.8	0.0308166	15.9773	0.225985
4.9	0.0338201	15.9547	0.226166
5	0.0368248	15.9329	0.226347
5.1	0.0398306	15.9118	0.226529
5.2	0.0428376	15.8914	0.226711
5.3	0.0458459	15.8718	0.226892
5.4	0.0488556	15.8529	0.227075
5.5	0.0518667	15.8347	0.227257
5.6	0.0548793	15.8172	0.22744
5.7	0.0578933	15.8003	0.227623
5.8	0.0609089	15.7841	0.227806
5.9	0.0639261	15.7686	0.22799
6	0.0669449	15.7538	0.228173
6.1	0.0699653	15.7396	0.228357
6.2	0.0729874	15.7261	0.228542
6.3	0.0760112	15.7132	0.228726
6.4	0.0790367	15.7009	0.228911
6.5	0.0820639	15.6891	0.229097
6.6	0.0850928	15.6778	0.229282
6.7	0.0881235	15.667	0.229468
6.8	0.091156	15.6566	0.229654
6.9	0.0941903	15.6466	0.229841
7	0.0972265	15.6368	0.230027
7.1	0.100264	15.6274	0.230214
7.2	0.103304	15.6182	0.230402
7.3	0.106346	15.6093	0.23059
7.4	0.109389	15.6005	0.230778
7.5	0.112434	15.5919	0.230966
7.6	0.115481	15.5835	0.231155
7.7	0.11853	15.5752	0.231344
7.8	0.121581	15.5672	0.231533
7.9	0.124633	15.5593	0.231723
8	0.127687	15.5515	0.231913
8.1	0.130743	15.544	0.232103
8.2	0.133801	15.5366	0.232294
8.3	0.13686	15.5293	0.232485
8.4	0.139922	15.5221	0.232677
8.5	0.142985	15.5151	0.232868
8.6	0.146049	15.5081	0.23306
8.7	0.149115	15.5011	0.233253
8.8	0.152183	15.4942	0.233446
8.9	0.155253	15.4874	0.233639
9	0.158324	15.4806	0.233832
9.1	0.161397	15.4738	0.234026
9.2	0.164472	15.467	0.234221
9.3	0.167548	15.4602	0.234415
9.4	0.170626	15.4534	0.23461
9.5	0.173706	15.4466	0.234806
9.6	0.176788	15.4397	0.235001
9.7	0.179871	15.4328	0.235197
9.8	0.182956	15.4258	0.235394
9.9	0.186043	15.4188	0.235591
10	0.189131	15.4117	0.235788
10.1	0.192221	15.4046	0.235985
10.2	0.195314	15.3974	0.236183
10.3	0.198407	15.3902	0.236382
10.4	0.201503	15.383	0.23658
10.5	0.2046	15.3758	0.23678
10.6	0.207699	15.3686	0.236979
10.7	0.2108	15.3615	0.237179
10.8	0.213903	15.3544	0.237379
10.9	0.217008	15.3473	0.23758
11	0.220114	15.3403	0.237781
11.1	0.223223	15.3332	0.237983
11.2	0.226333	15.3262	0.238185
11.3	0.229445	15.3191	0.238387
11.4	0.232559	15.3121	0.23859
11.5	0.235674	15.305	0.238793
11.6	0.238792	15.2979	0.238997
11.7	0.241911	15.2908	0.239201
11.8	0.245033	15.2837	0.239405
11.9	0.248156	15.2766	0.23961
12	0.251281	15.2695	0.239815
12.1	0.254409	15.2624	0.240021
12.2	0.257538	15.2554	0.240227
12.3	0.260669	15.2485	0.240433
12.4	0.263803	15.2417	0.24064
12.5	0.266938	15.2351	0.240847
12.6	0.270075	15.2286	0.241055
12.7	0.273215	15.2223	0.241263
12.8	0.276357	15.2163	0.241472
12.9	0.279501	15.2105	0.241681
13	0.282647	15.2049	0.24189
13.1	0.285795	15.1997	0.2421
13.2	0.288946	15.1948	0.24231
13.3	0.292098	15.1901	0.242521
13.4	0.295253	15.1859	0.242732
13.5	0.29841	15.1819	0.242943
13.6	0.301569	15.1783	0.243155
13.7	0.304731	15.175	0.243367
13.8	0.307895	15.172	0.243579
13.9	0.311061	15.1694	0.243792
14	0.314229	15.1671	0.244005
14.1	0.317399	15.1652	0.244218
14.2	0.320572	15.1637	0.244432
14.3	0.323746	15.1624	0.244646
14.4	0.326923	15.1615	0.244861
14.5	0.330102	15.1609	0.245076
14.6	0.333283	15.1607	0.245291
14.7	0.336466	15.1608	0.245506
14.8	0.339652	15.1612	0.245722
14.9	0.342839	15.1618	0.245938
15	0.346028	15.1627	0.246155
15.1	0.34922	15.1638	0.246371
15.2	0.352414	15.165	0.246588
15.3	0.35561	15.1662	0.246806
15.4	0.358807	15.1676	0.247023
15.5	0.362007	15.169	0.247241
15.6	0.365209	15.1704	0.247459
15.7	0.368413	15.1719	0.247677
15.8	0.371618	15.1735	0.247896
15.9	0.374826	15.1752	0.248114
16	0.378035	15.177	0.248333
16.1	0.381245	15.1789	0.248553
16.2	0.384457	15.181	0.248772
16.3	0.38767	15.1833	0.248992
16.4	0.390885	15.1858	0.249212
16.5	0.394101	15.1886	0.249432
16.6	0.397317	15.1916	0.249653
16.7	0.400535	15.195	0.249873
16.8	0.403753	15.1988	0.250094
16.9	0.406972	15.2029	0.250315
17	0.410191	15.2075	0.250537
17.1	0.413411	15.2124	0.250758
17.2	0.416631	15.2179	0.25098
17.3	0.419851	15.2238	0.251202
17.4	0.423071	15.2302	0.251424
17.5	0.426292	15.2371	0.251647
17.6	0.429513	15.2444	0.251869
17.7	0.432733	15.2522	0.252092
17.8	0.435954	15.2603	0.252315
17.9	0.439175	15.2688	0.252538
18	0.442395	15.2777	0.252761
18.1	0.445616	15.2868	0.252985
18.2	0.448837	15.2961	0.253209
18.3	0.452057	15.3055	0.253433
18.4	0.455278	15.3151	0.253657
18.5	0.458498	15.3247	0.253881
18.6	0.461719	15.3344	0.254106
18.7	0.464939	15.3441	0.254331
18.8	0.46816	15.3538	0.254556
18.9	0.47138	15.3635	0.254781
19	0.474601	15.3732	0.255006

## Sheet: Cholesterol
age	L	M	S
1	1.16994	4.11734	0.141127
1.1	1.16378	4.11852	0.1413
1.2	1.15762	4.1197	0.141473
1.3	1.15146	4.12088	0.141647
1.4	1.1453	4.12206	0.141821
1.5	1.13914	4.12323	0.141996
1.6	1.13298	4.12441	0.14217
1.7	1.12682	4.12558	0.142345
1.8	1.12066	4.12675	0.142519
1.9	1.11451	4.12792	0.142695
2	1.10835	4.12908	0.14287
2.1	1.10219	4.13024	0.143045
2.2	1.09604	4.13139	0.143221
2.3	1.08989	4.13254	0.143397
2.4	1.08373	4.13368	0.143573
2.5	1.07758	4.13482	0.14375
2.6	1.07143	4.13595	0.143926
2.7	1.06528	4.13708	0.144103
2.8	1.05913	4.13819	0.14428
2.9	1.05298	4.1393	0.144458
3	1.04683	4.1404	0.144635
3.1	1.04069	4.14149	0.144813
3.2	1.03454	4.14257	0.144991
3.3	1.0284	4.14365	0.14517
3.4	1.02225	4.14471	0.145348
3.5	1.01611	4.14576	0.145527
3.6	1.00997	4.1468	0.145706
3.7	1.00383	4.14784	0.145885
3.8	0.997691	4.14885	0.146065
3.9	0.991553	4.14986	0.146245
4	0.985416	4.15085	0.146424
4.1	0.97928	4.15183	0.146605
4.2	0.973146	4.15279	0.146785
4.3	0.967013	4.15374	0.146966
4.4	0.960881	4.15467	0.147147
4.5	0.954751	4.15558	0.147328
4.6	0.948621	4.15647	0.147509
4.7	0.942494	4.15734	0.147691
4.8	0.936367	4.15818	0.147872
4.9	0.930242	4.159	0.148054
5	0.924119	4.1598	0.148237
5.1	0.917997	4.16056	0.148419
5.2	0.911876	4.1613	0.148602
5.3	0.905758	4.16201	0.148785
5.4	0.899641	4.16269	0.148968
5.5	0.893527	4.16333	0.149152
5.6	0.887415	4.16394	0.149336
5.7	0.881305	4.16452	0.14952
5.8	0.875198	4.16506	0.149704
5.9	0.869093	4.16556	0.149888
6	0.86299	4.16602	0.150073
6.1	0.856889	4.16645	0.150258
6.2	0.850791	4.16684	0.150443
6.3	0.844695	4.16719	0.150629
6.4	0.838601	4.16749	0.150815
6.5	0.83251	4.16775	0.151
6.6	0.826421	4.16797	0.151187
6.7	0.820335	4.16814	0.151373
6.8	0.814251	4.16827	0.15156
6.9	0.80817	4.16834	0.151746
7	0.802091	4.16837	0.151933
7.1	0.796016	4.16834	0.152121
7.2	0.789943	4.16826	0.152308
7.3	0.783874	4.16813	0.152496
7.4	0.777808	4.16794	0.152684
7.5	0.771745	4.1677	0.152872
7.6	0.765685	4.1674	0.153061
7.7	0.759629	4.16704	0.153249
7.8	0.753576	4.16663	0.153438
7.9	0.747528	4.16616	0.153628
8	0.741483	4.16564	0.153817
8.1	0.735441	4.16506	0.154007
8.2	0.729404	4.16442	0.154197
8.3	0.723371	4.16372	0.154387
8.4	0.717341	4.16296	0.154578
8.5	0.711316	4.16214	0.154768
8.6	0.705295	4.16127	0.154959
8.7	0.699277	4.16033	0.15515
8.8	0.693264	4.15933	0.155342
8.9	0.687255	4.15827	0.155533
9	0.68125	4.15715	0.155725
9.1	0.675249	4.15597	0.155917
9.2	0.669251	4.15473	0.156109
9.3	0.663258	4.15343	0.156302
9.4	0.657268	4.15207	0.156494
9.5	0.651282	4.15064	0.156687
9.6	0.645299	4.14916	0.15688
9.7	0.639319	4.14761	0.157073
9.8	0.633343	4.14601	0.157266
9.9	0.627369	4.14434	0.157459
10	0.621398	4.1426	0.157652
10.1	0.61543	4.1408	0.157845
10.2	0.609464	4.13894	0.158039
10.3	0.6035	4.13701	0.158232
10.4	0.597539	4.13502	0.158426
10.5	0.591579	4.13296	0.158619
10.6	0.585621	4.13084	0.158813
10.7	0.579664	4.12866	0.159007
10.8	0.573707	4.12641	0.159201
10.9	0.567751	4.12411	0.159394
11	0.561794	4.12174	0.159588
11.1	0.555837	4.11931	0.159782
11.2	0.549879	4.11683	0.159976
11.3	0.54392	4.11429	0.16017
11.4	0.53796	4.11169	0.160364
11.5	0.531998	4.10905	0.160557
11.6	0.526034	4.10635	0.160751
11.7	0.520067	4.1036	0.160945
11.8	0.514099	4.1008	0.161139
11.9	0.508129	4.09795	0.161332
12	0.502156	4.09506	0.161526
12.1	0.49618	4.09212	0.16172
12.2	0.490201	4.08914	0.161913
12.3	0.484219	4.08611	0.162107
12.4	0.478234	4.08304	0.1623
12.5	0.472245	4.07994	0.162494
12.6	0.466253	4.07679	0.162687
12.7	0.460257	4.07361	0.16288
12.8	0.454257	4.07039	0.163073
12.9	0.448252	4.06714	0.163267
13	0.442243	4.06386	0.16346
13.1	0.43623	4.06054	0.163653
13.2	0.430212	4.0572	0.163845
13.3	0.424188	4.05383	0.164038
13.4	0.418159	4.05044	0.164231
13.5	0.412125	4.04702	0.164424
13.6	0.406086	4.04359	0.164617
13.7	0.40004	4.04014	0.16481
13.8	0.393989	4.03667	0.165002
13.9	0.387931	4.03319	0.165195
14	0.381867	4.0297	0.165388
14.1	0.375797	4.02621	0.165581
14.2	0.36972	4.02271	0.165773
14.3	0.363637	4.01922	0.165966
14.4	0.357547	4.01572	0.166159
14.5	0.351451	4.01223	0.166352
14.6	0.345349	4.00874	0.166545
14.7	0.33924	4.00525	0.166738
14.8	0.333126	4.00178	0.166931
14.9	0.327005	3.99831	0.167124
15	0.320879	3.99484	0.167317
15.1	0.314747	3.99139	0.167511
15.2	0.30861	3.98794	0.167704
15.3	0.302468	3.9845	0.167898
15.4	0.29632	3.98107	0.168092
15.5	0.290169	3.97765	0.168286
15.6	0.284012	3.97424	0.16848
15.7	0.277852	3.97084	0.168674
15.8	0.271687	3.96745	0.168868
15.9	0.265518	3.96407	0.169063
16	0.259346	3.9607	0.169258
16.1	0.25317	3.95734	0.169453
16.2	0.246991	3.954	0.169648
16.3	0.240809	3.95067	0.169843
16.4	0.234624	3.94736	0.170039
16.5	0.228437	3.94405	0.170234
16.6	0.222248	3.94077	0.17043
16.7	0.216056	3.93749	0.170626
16.8	0.209863	3.93423	0.170823
16.9	0.203668	3.93097	0.171019
17	0.197472	3.92773	0.171216
17.1	0.191275	3.9245	0.171413
17.2	0.185076	3.92128	0.17161
17.3	0.178876	3.91806	0.171808
17.4	0.172674	3.91486	0.172005
17.5	0.166472	3.91166	0.172203
17.6	0.160269	3.90847	0.172401
17.7	0.154065	3.90528	0.172599
17.8	0.14786	3.90211	0.172798
17.9	0.141655	3.89893	0.172997
18	0.135449	3.89577	0.173195
18.1	0.129242	3.8926	0.173395
18.2	0.123035	3.88944	0.173594
18.3	0.116828	3.88628	0.173793
18.4	0.110621	3.88313	0.173993
18.5	0.104414	3.87997	0.174193
18.6	0.098207	3.87681	0.174393
18.7	0.0919999	3.87365	0.174594
18.8	0.0857927	3.8705	0.174795
18.9	0.0795855	3.86734	0.174996
19	0.0733784	3.86418	0.175197

## Sheet: Creatinine_F
age	L	M	S
1	0.7434	19.2624	0.181406
1.1	0.730573	19.5551	0.180954
1.2	0.717747	19.8478	0.180504
1.3	0.704924	20.1405	0.180055
1.4	0.692106	20.4332	0.179607
1.5	0.679293	20.7259	0.17916
1.6	0.666482	21.0185	0.178714
1.7	0.653674	21.311	0.178269
1.8	0.640866	21.6035	0.177825
1.9	0.628056	21.8958	0.177382
2	0.61525	22.188	0.176939
2.1	0.602457	22.4801	0.176497
2.2	0.589686	22.772	0.176056
2.3	0.576943	23.0637	0.175616
2.4	0.564236	23.3552	0.175177
2.5	0.551573	23.6464	0.174739
2.6	0.538961	23.9373	0.174302
2.7	0.526408	24.2279	0.173867
2.8	0.513922	24.5182	0.173433
2.9	0.501506	24.808	0.173
3	0.489166	25.0975	0.172569
3.1	0.476906	25.3865	0.172139
3.2	0.464732	25.6751	0.171711
3.3	0.452646	25.9633	0.171284
3.4	0.440648	26.2509	0.170859
3.5	0.428738	26.5381	0.170434
3.6	0.416918	26.8247	0.170011
3.7	0.405191	27.1107	0.169588
3.8	0.393559	27.3962	0.169166
3.9	0.382025	27.6811	0.168744
4	0.370592	27.9653	0.168323
4.1	0.359266	28.249	0.167901
4.2	0.348049	28.532	0.167479
4.3	0.336951	28.8143	0.167056
4.4	0.325985	29.0959	0.166633
4.5	0.315163	29.3769	0.166209
4.6	0.304498	29.6571	0.165783
4.7	0.294003	29.9365	0.165356
4.8	0.28369	30.2151	0.164927
4.9	0.27357	30.4928	0.164496
5	0.263654	30.7697	0.164063
5.1	0.253954	31.0456	0.163627
5.2	0.244481	31.3206	0.163189
5.3	0.235248	31.5945	0.162748
5.4	0.226271	31.8674	0.162303
5.5	0.217565	32.1393	0.161856
5.6	0.209145	32.4101	0.161405
5.7	0.201027	32.6797	0.16095
5.8	0.193226	32.9481	0.160492
5.9	0.185756	33.2154	0.160031
6	0.178628	33.4814	0.159565
6.1	0.171856	33.7463	0.159097
6.2	0.16545	34.0099	0.158626
6.3	0.159421	34.2724	0.158152
6.4	0.15377	34.5335	0.157675
6.5	0.148488	34.7935	0.157197
6.6	0.143566	35.0522	0.156717
6.7	0.138994	35.3098	0.156237
6.8	0.134763	35.5662	0.155756
6.9	0.130863	35.8215	0.155275
7	0.127285	36.0756	0.154794
7.1	0.124024	36.3286	0.154314
7.2	0.121072	36.5805	0.153836
7.3	0.118427	36.8313	0.153359
7.4	0.116082	37.081	0.152885
7.5	0.114034	37.3297	0.152412
7.6	0.112277	37.5773	0.151943
7.7	0.110807	37.824	0.151477
7.8	0.109619	38.0696	0.151014
7.9	0.108705	38.3142	0.150555
8	0.108061	38.5579	0.1501
8.1	0.107677	38.8006	0.149649
8.2	0.107541	39.0423	0.149202
8.3	0.107643	39.2832	0.148761
8.4	0.107972	39.5232	0.148324
8.5	0.108517	39.7623	0.147893
8.6	0.109266	40.0005	0.147468
8.7	0.110209	40.238	0.147049
8.8	0.111337	40.4747	0.146636
8.9	0.112642	40.7106	0.14623
9	0.114116	40.9457	0.14583
9.1	0.115751	41.1802	0.145437
9.2	0.117541	41.4139	0.14505
9.3	0.119478	41.6469	0.144671
9.4	0.121555	41.8793	0.144298
9.5	0.123763	42.1111	0.143932
9.6	0.126096	42.3423	0.143573
9.7	0.128547	42.5729	0.143221
9.8	0.131107	42.803	0.142875
9.9	0.133767	43.0325	0.142537
10	0.136516	43.2617	0.142205
10.1	0.139346	43.4903	0.141879
10.2	0.142246	43.7186	0.141561
10.3	0.145208	43.9465	0.141249
10.4	0.148219	44.174	0.140944
10.5	0.151268	44.4012	0.140646
10.6	0.154343	44.628	0.140355
10.7	0.157431	44.8546	0.14007
10.8	0.160519	45.081	0.139792
10.9	0.163597	45.307	0.139521
11	0.166653	45.5329	0.139256
11.1	0.169683	45.7586	0.138998
11.2	0.172688	45.984	0.138747
11.3	0.175675	46.2093	0.138502
11.4	0.178646	46.4344	0.138264
11.5	0.181607	46.6594	0.138034
11.6	0.184563	46.8841	0.13781
11.7	0.187519	47.1088	0.137593
11.8	0.19048	47.3332	0.137383
11.9	0.193453	47.5575	0.137179
12	0.196442	47.7817	0.136982
12.1	0.199454	48.0057	0.136792
12.2	0.202495	48.2295	0.136608
12.3	0.205572	48.4532	0.136431
12.4	0.208691	48.6767	0.136261
12.5	0.21186	48.9	0.136097
12.6	0.215086	49.1231	0.135939
12.7	0.218377	49.3461	0.135788
12.8	0.22174	49.5688	0.135643
12.9	0.225181	49.7913	0.135504
13	0.228708	50.0136	0.135371
13.1	0.232326	50.2356	0.135243
13.2	0.236041	50.4573	0.135122
13.3	0.239859	50.6787	0.135005
13.4	0.243782	50.8997	0.134894
13.5	0.247812	51.1204	0.134787
13.6	0.25195	51.3407	0.134685
13.7	0.256196	51.5606	0.134587
13.8	0.260555	51.7801	0.134493
13.9	0.265028	51.999	0.134403
14	0.269618	52.2175	0.134315
14.1	0.274326	52.4355	0.134231
14.2	0.279149	52.6529	0.134149
14.3	0.284084	52.8698	0.134069
14.4	0.28913	53.0861	0.133991
14.5	0.294285	53.3019	0.133915
14.6	0.299548	53.517	0.13384
14.7	0.304915	53.7315	0.133767
14.8	0.310384	53.9454	0.133693
14.9	0.315953	54.1586	0.133621
15	0.321622	54.3711	0.133548
15.1	0.327389	54.583	0.133476
15.2	0.333252	54.7943	0.133403
15.3	0.33921	55.0049	0.13333
15.4	0.345257	55.2148	0.133257
15.5	0.351384	55.4241	0.133182
15.6	0.357587	55.6328	0.133108
15.7	0.36386	55.841	0.133032
15.8	0.370199	56.0485	0.132957
15.9	0.376599	56.2554	0.132881
16	0.383055	56.4619	0.132804
16.1	0.389565	56.6677	0.132726
16.2	0.396127	56.8731	0.132648
16.3	0.40274	57.078	0.13257
16.4	0.40941	57.2824	0.13249
16.5	0.416141	57.4864	0.132409
16.6	0.422933	57.6899	0.132327
16.7	0.429781	57.893	0.132244
16.8	0.436681	58.0958	0.132159
16.9	0.443623	58.2982	0.132074
17	0.450603	58.5003	0.131988
17.1	0.457614	58.702	0.131901
17.2	0.464652	58.9035	0.131813
17.3	0.471719	59.1048	0.131724
17.4	0.478813	59.3059	0.131634
17.5	0.485935	59.5068	0.131544
17.6	0.493085	59.7075	0.131453
17.7	0.500264	59.9081	0.131361
17.8	0.507468	60.1086	0.131269
17.9	0.514694	60.309	0.131176
18	0.521938	60.5093	0.131083
18.1	0.529195	60.7096	0.130991
18.2	0.536459	60.9099	0.130898
18.3	0.543727	61.1101	0.130805
18.4	0.550996	61.3104	0.130713
18.5	0.558264	61.5107	0.130621
18.6	0.565531	61.711	0.130529
18.7	0.572797	61.9113	0.130437
18.8	0.580063	62.1116	0.130345
18.9	0.58733	62.3119	0.130253
19	0.594596	62.5121	0.130162

## Sheet: Creatinine_M
age	L	M	S
1	-1.01556	19.1029	0.180768
1.1	-1.00248	19.4011	0.180301
1.2	-0.989401	19.6994	0.179835
1.3	-0.976317	19.9976	0.179371
1.4	-0.963229	20.2957	0.178908
1.5	-0.950135	20.5938	0.178446
1.6	-0.937035	20.8919	0.177985
1.7	-0.923924	21.1898	0.177527
1.8	-0.910803	21.4876	0.177069
1.9	-0.897668	21.7852	0.176614
2	-0.884519	22.0827	0.17616
2.1	-0.871354	22.3801	0.175708
2.2	-0.858176	22.6772	0.175257
2.3	-0.844981	22.9741	0.174809
2.4	-0.831767	23.2708	0.174362
2.5	-0.818534	23.5672	0.173918
2.6	-0.805281	23.8632	0.173475
2.7	-0.79201	24.159	0.173036
2.8	-0.77872	24.4544	0.172599
2.9	-0.765412	24.7495	0.172166
3	-0.752086	25.0442	0.171735
3.1	-0.738739	25.3385	0.171308
3.2	-0.725371	25.6324	0.170885
3.3	-0.711981	25.9259	0.170465
3.4	-0.698571	26.2189	0.170048
3.5	-0.68514	26.5116	0.169635
3.6	-0.671689	26.8039	0.169226
3.7	-0.658217	27.0957	0.168819
3.8	-0.644726	27.3872	0.168416
3.9	-0.631216	27.6782	0.168017
4	-0.617686	27.9688	0.16762
4.1	-0.604136	28.259	0.167227
4.2	-0.590568	28.5487	0.166836
4.3	-0.576984	28.8381	0.166448
4.4	-0.563387	29.1272	0.166062
4.5	-0.549782	29.4159	0.165679
4.6	-0.536168	29.7043	0.165298
4.7	-0.522546	29.9925	0.164919
4.8	-0.508917	30.2803	0.164542
4.9	-0.495283	30.5679	0.164166
5	-0.481643	30.8552	0.163793
5.1	-0.467999	31.1423	0.163421
5.2	-0.454342	31.4292	0.16305
5.3	-0.440665	31.7159	0.162681
5.4	-0.426959	32.0024	0.162313
5.5	-0.413217	32.2886	0.161947
5.6	-0.399432	32.5747	0.161583
5.7	-0.385602	32.8606	0.16122
5.8	-0.371721	33.1464	0.160859
5.9	-0.357783	33.4321	0.160499
6	-0.343784	33.7176	0.160142
6.1	-0.329719	34.003	0.159786
6.2	-0.315586	34.2884	0.159432
6.3	-0.301386	34.5737	0.159079
6.4	-0.287118	34.8589	0.158729
6.5	-0.272783	35.1441	0.158381
6.6	-0.258383	35.4294	0.158036
6.7	-0.243921	35.7146	0.157692
6.8	-0.229403	35.9998	0.157352
6.9	-0.214842	36.2851	0.157014
7	-0.200253	36.5706	0.15668
7.1	-0.185647	36.8561	0.156349
7.2	-0.171035	37.1418	0.156022
7.3	-0.156427	37.4276	0.155699
7.4	-0.14183	37.7136	0.155381
7.5	-0.127255	37.9999	0.155067
7.6	-0.112709	38.2864	0.154758
7.7	-0.0982025	38.5732	0.154455
7.8	-0.0837429	38.8603	0.154156
7.9	-0.06934	39.1477	0.153863
8	-0.0550028	39.4356	0.153576
8.1	-0.0407395	39.7239	0.153294
8.2	-0.0265578	40.0127	0.153018
8.3	-0.0124652	40.302	0.152748
8.4	0.00153089	40.592	0.152483
8.5	0.0154226	40.8826	0.152225
8.6	0.0292021	41.1738	0.151973
8.7	0.042862	41.4659	0.151727
8.8	0.0563945	41.7588	0.151486
8.9	0.0697915	42.0525	0.151252
9	0.0830474	42.3472	0.151023
9.1	0.0961618	42.6429	0.150801
9.2	0.109134	42.9396	0.150584
9.3	0.121964	43.2374	0.150374
9.4	0.13465	43.5364	0.15017
9.5	0.147188	43.8366	0.149971
9.6	0.159573	44.138	0.149779
9.7	0.1718	44.4408	0.149593
9.8	0.183861	44.745	0.149414
9.9	0.195753	45.0506	0.149241
10	0.20747	45.3577	0.149074
10.1	0.219009	45.6662	0.148914
10.2	0.230365	45.9764	0.14876
10.3	0.241534	46.2882	0.148614
10.4	0.252514	46.6016	0.148474
10.5	0.263302	46.9167	0.14834
10.6	0.273897	47.2335	0.148214
10.7	0.284294	47.5521	0.148093
10.8	0.29449	47.8726	0.147979
10.9	0.304481	48.1949	0.147871
11	0.314264	48.5191	0.147769
11.1	0.323837	48.8453	0.147673
11.2	0.333195	49.1733	0.147582
11.3	0.342335	49.5034	0.147496
11.4	0.351253	49.8355	0.147415
11.5	0.359947	50.1695	0.147338
11.6	0.368411	50.5057	0.147267
11.7	0.376642	50.8438	0.147199
11.8	0.384635	51.184	0.147136
11.9	0.392381	51.5263	0.147076
12	0.399874	51.8707	0.14702
12.1	0.407106	52.2171	0.146966
12.2	0.414067	52.5655	0.146915
12.3	0.420751	52.916	0.146866
12.4	0.42715	53.2686	0.146819
12.5	0.433255	53.6232	0.146773
12.6	0.439058	53.9798	0.146728
12.7	0.444549	54.3384	0.146684
12.8	0.449719	54.6991	0.14664
12.9	0.454567	55.0617	0.146596
13	0.459098	55.4262	0.146551
13.1	0.463317	55.7927	0.146506
13.2	0.467229	56.1611	0.14646
13.3	0.470834	56.5314	0.146413
13.4	0.474137	56.9035	0.146365
13.5	0.477137	57.2775	0.146316
13.6	0.479836	57.6532	0.146265
13.7	0.482236	58.0307	0.146213
13.8	0.484337	58.41	0.146159
13.9	0.48614	58.791	0.146103
14	0.487644	59.1737	0.146044
14.1	0.488852	59.558	0.145984
14.2	0.489764	59.9439	0.145921
14.3	0.490381	60.3314	0.145856
14.4	0.490706	60.7205	0.145789
14.5	0.490741	61.111	0.145719
14.6	0.490494	61.503	0.145647
14.7	0.489973	61.8964	0.145573
14.8	0.489188	62.2911	0.145497
14.9	0.488146	62.6871	0.145419
15	0.48686	63.0844	0.145339
15.1	0.48534	63.4828	0.145258
15.2	0.483598	63.8823	0.145175
15.3	0.481645	64.2828	0.145091
15.4	0.479489	64.6843	0.145007
15.5	0.477143	65.0867	0.144921
15.6	0.474615	65.49	0.144835
15.7	0.471913	65.894	0.144748
15.8	0.469045	66.2988	0.14466
15.9	0.466019	66.7042	0.144572
16	0.462844	67.1103	0.144483
16.1	0.459526	67.5168	0.144394
16.2	0.456076	67.9239	0.144304
16.3	0.452507	68.3314	0.144213
16.4	0.448832	68.7392	0.144122
16.5	0.445061	69.1473	0.14403
16.6	0.441201	69.5557	0.143937
16.7	0.437263	69.9643	0.143844
16.8	0.433253	70.373	0.143751
16.9	0.42918	70.7819	0.143657
17	0.425056	71.1908	0.143563
17.1	0.420889	71.5998	0.143469
17.2	0.41669	72.0088	0.143374
17.3	0.412464	72.4178	0.143279
17.4	0.408213	72.8268	0.143185
17.5	0.403939	73.2358	0.14309
17.6	0.399642	73.6447	0.142996
17.7	0.395325	74.0536	0.142902
17.8	0.390991	74.4624	0.142808
17.9	0.386644	74.8712	0.142715
18	0.382289	75.2799	0.142621
18.1	0.377932	75.6886	0.142527
18.2	0.373575	76.0973	0.142434
18.3	0.369223	76.5059	0.14234
18.4	0.364876	76.9145	0.142245
18.5	0.360533	77.3231	0.142151
18.6	0.356197	77.7317	0.142056
18.7	0.351864	78.1402	0.141962
18.8	0.347536	78.5488	0.141867
18.9	0.343209	78.9573	0.141772
19	0.338882	79.3659	0.141677

## Sheet: Estradiol_F
age	L	M	S
10	-0.522453	17.6338	0.038176
10.1	-0.522453	17.6693	0.038176
10.2	-0.522453	17.705	0.038176
10.3	-0.522453	17.7406	0.038176
10.4	-0.522453	17.7764	0.038176
10.5	-0.522453	17.8122	0.038176
10.6	-0.522453	17.8481	0.038176
10.7	-0.522453	17.884	0.038176
10.8	-0.522453	17.92	0.038176
10.9	-0.522453	17.9561	0.038176
11	-0.522453	17.9921	0.038176
11.1	-0.522453	18.0282	0.038176
11.2	-0.522453	18.0642	0.038176
11.3	-0.522453	18.1002	0.038176
11.4	-0.522453	18.1361	0.038176
11.5	-0.522453	18.1718	0.038176
11.6	-0.522453	18.2075	0.038176
11.7	-0.522453	18.243	0.038176
11.8	-0.522453	18.2782	0.038176
11.9	-0.522453	18.3132	0.038176
12	-0.522453	18.3479	0.038176
12.1	-0.522453	18.3823	0.038176
12.2	-0.522453	18.4164	0.038176
12.3	-0.522453	18.45	0.038176
12.4	-0.522453	18.4833	0.038176
12.5	-0.522453	18.516	0.038176
12.6	-0.522453	18.5482	0.038176
12.7	-0.522453	18.5799	0.038176
12.8	-0.522453	18.6111	0.038176
12.9	-0.522453	18.6416	0.038176
13	-0.522453	18.6716	0.038176
13.1	-0.522453	18.7009	0.038176
13.2	-0.522453	18.7295	0.038176
13.3	-0.522453	18.7575	0.038176
13.4	-0.522453	18.7848	0.038176
13.5	-0.522453	18.8114	0.038176
13.6	-0.522453	18.8371	0.038176
13.7	-0.522453	18.8621	0.038176
13.8	-0.522453	18.8863	0.038176
13.9	-0.522453	18.9095	0.038176
14	-0.522453	18.9319	0.038176
14.1	-0.522453	18.9532	0.038176
14.2	-0.522453	18.9736	0.038176
14.3	-0.522453	18.993	0.038176
14.4	-0.522453	19.0112	0.038176
14.5	-0.522453	19.0283	0.038176
14.6	-0.522453	19.0443	0.038176
14.7	-0.522453	19.0591	0.038176
14.8	-0.522453	19.0728	0.038176
14.9	-0.522453	19.0853	0.038176
15	-0.522453	19.0966	0.038176
15.1	-0.522453	19.1068	0.038176
15.2	-0.522453	19.1158	0.038176
15.3	-0.522453	19.1236	0.038176
15.4	-0.522453	19.1303	0.038176
15.5	-0.522453	19.1359	0.038176
15.6	-0.522453	19.1404	0.038176
15.7	-0.522453	19.1439	0.038176
15.8	-0.522453	19.1464	0.038176
15.9	-0.522453	19.1479	0.038176
16	-0.522453	19.1484	0.038176
16.1	-0.522453	19.1481	0.038176
16.2	-0.522453	19.1469	0.038176
16.3	-0.522453	19.1448	0.038176
16.4	-0.522453	19.1419	0.038176
16.5	-0.522453	19.1383	0.038176
16.6	-0.522453	19.134	0.038176
16.7	-0.522453	19.129	0.038176
16.8	-0.522453	19.1233	0.038176
16.9	-0.522453	19.117	0.038176
17	-0.522453	19.1102	0.038176
17.1	-0.522453	19.1029	0.038176
17.2	-0.522453	19.0952	0.038176
17.3	-0.522453	19.087	0.038176
17.4	-0.522453	19.0785	0.038176
17.5	-0.522453	19.0696	0.038176
17.6	-0.522453	19.0605	0.038176
17.7	-0.522453	19.0512	0.038176
17.8	-0.522453	19.0416	0.038176
17.9	-0.522453	19.0318	0.038176
18	-0.522453	19.0219	0.038176
18.1	-0.522453	19.0118	0.038176
18.2	-0.522453	19.0015	0.038176
18.3	-0.522453	18.9911	0.038176
18.4	-0.522453	18.9807	0.038176
18.5	-0.522453	18.9701	0.038176
18.6	-0.522453	18.9595	0.038176
18.7	-0.522453	18.9488	0.038176
18.8	-0.522453	18.9382	0.038176
18.9	-0.522453	18.9275	0.038176
19	-0.522453	18.9169	0.038176

## Sheet: Estradiol_M
age	L	M	S
10	-5.83501	17.4123	0.0158976
10.1	-5.83501	17.4195	0.0158976
10.2	-5.83501	17.4268	0.0158976
10.3	-5.83501	17.4341	0.0158976
10.4	-5.83501	17.4414	0.0158976
10.5	-5.83501	17.4487	0.0158976
10.6	-5.83501	17.456	0.0158976
10.7	-5.83501	17.4634	0.0158976
10.8	-5.83501	17.4708	0.0158976
10.9	-5.83501	17.4783	0.0158976
11	-5.83501	17.4858	0.0158976
11.1	-5.83501	17.4935	0.0158976
11.2	-5.83501	17.5012	0.0158976
11.3	-5.83501	17.509	0.0158976
11.4	-5.83501	17.5169	0.0158976
11.5	-5.83501	17.525	0.0158976
11.6	-5.83501	17.5331	0.0158976
11.7	-5.83501	17.5414	0.0158976
11.8	-5.83501	17.5499	0.0158976
11.9	-5.83501	17.5586	0.0158976
12	-5.83501	17.5674	0.0158976
12.1	-5.83501	17.5764	0.0158976
12.2	-5.83501	17.5857	0.0158976
12.3	-5.83501	17.5951	0.0158976
12.4	-5.83501	17.6049	0.0158976
12.5	-5.83501	17.6148	0.0158976
12.6	-5.83501	17.6251	0.0158976
12.7	-5.83501	17.6357	0.0158976
12.8	-5.83501	17.6467	0.0158976
12.9	-5.83501	17.6579	0.0158976
13	-5.83501	17.6694	0.0158976
13.1	-5.83501	17.6812	0.0158976
13.2	-5.83501	17.6934	0.0158976
13.3	-5.83501	17.7058	0.0158976
13.4	-5.83501	17.7186	0.0158976
13.5	-5.83501	17.7316	0.0158976
13.6	-5.83501	17.7449	0.0158976
13.7	-5.83501	17.7585	0.0158976
13.8	-5.83501	17.7722	0.0158976
13.9	-5.83501	17.7862	0.0158976
14	-5.83501	17.8002	0.0158976
14.1	-5.83501	17.8144	0.0158976
14.2	-5.83501	17.8287	0.0158976
14.3	-5.83501	17.843	0.0158976
14.4	-5.83501	17.8572	0.0158976
14.5	-5.83501	17.8715	0.0158976
14.6	-5.83501	17.8857	0.0158976
14.7	-5.83501	17.8999	0.0158976
14.8	-5.83501	17.914	0.0158976
14.9	-5.83501	17.928	0.0158976
15	-5.83501	17.942	0.0158976
15.1	-5.83501	17.9559	0.0158976
15.2	-5.83501	17.9696	0.0158976
15.3	-5.83501	17.9831	0.0158976
15.4	-5.83501	17.9965	0.0158976
15.5	-5.83501	18.0097	0.0158976
15.6	-5.83501	18.0225	0.0158976
15.7	-5.83501	18.0351	0.0158976
15.8	-5.83501	18.0472	0.0158976
15.9	-5.83501	18.0589	0.0158976
16	-5.83501	18.0701	0.0158976
16.1	-5.83501	18.0809	0.0158976
16.2	-5.83501	18.0911	0.0158976
16.3	-5.83501	18.1009	0.0158976
16.4	-5.83501	18.1102	0.0158976
16.5	-5.83501	18.119	0.0158976
16.6	-5.83501	18.1274	0.0158976
16.7	-5.83501	18.1354	0.0158976
16.8	-5.83501	18.1429	0.0158976
16.9	-5.83501	18.1502	0.0158976
17	-5.83501	18.157	0.0158976
17.1	-5.83501	18.1636	0.0158976
17.2	-5.83501	18.1698	0.0158976
17.3	-5.83501	18.1758	0.0158976
17.4	-5.83501	18.1815	0.0158976
17.5	-5.83501	18.187	0.0158976
17.6	-5.83501	18.1924	0.0158976
17.7	-5.83501	18.1975	0.0158976
17.8	-5.83501	18.2025	0.0158976
17.9	-5.83501	18.2073	0.0158976
18	-5.83501	18.2119	0.0158976
18.1	-5.83501	18.2163	0.0158976
18.2	-5.83501	18.2206	0.0158976
18.3	-5.83501	18.2246	0.0158976
18.4	-5.83501	18.2285	0.0158976
18.5	-5.83501	18.2323	0.0158976
18.6	-5.83501	18.236	0.0158976
18.7	-5.83501	18.2395	0.0158976
18.8	-5.83501	18.243	0.0158976
18.9	-5.83501	18.2465	0.0158976
19	-5.83501	18.2499	0.0158976

## Sheet: Ferritin_F
age	L	M	S
1	-0.0306418	57.4376	0.49516
1.1	-0.0265329	57.404	0.49519
1.2	-0.022424	57.371	0.49522
1.3	-0.0183151	57.3391	0.49525
1.4	-0.0142064	57.3088	0.49528
1.5	-0.0100977	57.2806	0.49531
1.6	-0.00598922	57.255	0.49534
1.7	-0.00188088	57.2326	0.495371
1.8	0.00222725	57.2138	0.495401
1.9	0.00633514	57.199	0.495431
2	0.0104428	57.1888	0.495461
2.1	0.0145501	57.1834	0.495491
2.2	0.0186571	57.1834	0.495522
2.3	0.0227638	57.1893	0.495552
2.4	0.0268701	57.2015	0.495582
2.5	0.0309759	57.2205	0.495613
2.6	0.0350813	57.2467	0.495643
2.7	0.0391862	57.2807	0.495674
2.8	0.0432906	57.3228	0.495705
2.9	0.0473945	57.3738	0.495736
3	0.0514978	57.4339	0.495766
3.1	0.0556005	57.5039	0.495797
3.2	0.0597026	57.5842	0.495828
3.3	0.063804	57.6754	0.49586
3.4	0.0679047	57.7781	0.495891
3.5	0.0720048	57.8927	0.495922
3.6	0.076104	58.0197	0.495954
3.7	0.0802025	58.1594	0.495985
3.8	0.0843002	58.3123	0.496017
3.9	0.0883971	58.4787	0.496049
4	0.0924931	58.6585	0.496081
4.1	0.0965883	58.8519	0.496113
4.2	0.100683	59.0587	0.496145
4.3	0.104776	59.2788	0.496177
4.4	0.108869	59.512	0.496209
4.5	0.11296	59.758	0.496242
4.6	0.117051	60.0161	0.496275
4.7	0.121141	60.2858	0.496307
4.8	0.12523	60.5666	0.49634
4.9	0.129318	60.858	0.496374
5	0.133406	61.1595	0.496407
5.1	0.137492	61.4706	0.496441
5.2	0.141578	61.7904	0.496474
5.3	0.145663	62.1181	0.496508
5.4	0.149748	62.4531	0.496543
5.5	0.153831	62.7943	0.496577
5.6	0.157914	63.1411	0.496612
5.7	0.161996	63.4927	0.496647
5.8	0.166077	63.8482	0.496682
5.9	0.170158	64.2068	0.496717
6	0.174238	64.5678	0.496753
6.1	0.178318	64.9306	0.496789
6.2	0.182397	65.2945	0.496825
6.3	0.186475	65.6589	0.496861
6.4	0.190553	66.0233	0.496898
6.5	0.19463	66.387	0.496935
6.6	0.198707	66.7497	0.496973
6.7	0.202783	67.1106	0.497011
6.8	0.206859	67.4692	0.497049
6.9	0.210934	67.8246	0.497087
7	0.215009	68.1764	0.497126
7.1	0.219084	68.5239	0.497165
7.2	0.223158	68.8665	0.497204
7.3	0.227232	69.2038	0.497244
7.4	0.231305	69.5351	0.497284
7.5	0.235379	69.8601	0.497325
7.6	0.239452	70.1781	0.497366
7.7	0.243524	70.4888	0.497407
7.8	0.247597	70.7916	0.497449
7.9	0.251669	71.0862	0.497491
8	0.255741	71.3721	0.497533
8.1	0.259813	71.6493	0.497576
8.2	0.263885	71.9174	0.497619
8.3	0.267956	72.1762	0.497663
8.4	0.272028	72.4258	0.497707
8.5	0.276099	72.666	0.497752
8.6	0.280171	72.8966	0.497796
8.7	0.284242	73.1178	0.497842
8.8	0.288313	73.3294	0.497888
8.9	0.292385	73.5313	0.497934
9	0.296456	73.7233	0.497981
9.1	0.300527	73.9055	0.498028
9.2	0.304599	74.0777	0.498075
9.3	0.30867	74.2398	0.498123
9.4	0.312742	74.3919	0.498172
9.5	0.316814	74.5338	0.498221
9.6	0.320886	74.6654	0.49827
9.7	0.324958	74.7869	0.49832
9.8	0.32903	74.8982	0.49837
9.9	0.333103	74.9993	0.498421
10	0.337175	75.0904	0.498473
10.1	0.341249	75.1714	0.498524
10.2	0.345322	75.2425	0.498577
10.3	0.349396	75.3036	0.49863
10.4	0.35347	75.3547	0.498683
10.5	0.357544	75.3956	0.498737
10.6	0.361619	75.4263	0.498791
10.7	0.365694	75.4467	0.498846
10.8	0.36977	75.4568	0.498901
10.9	0.373846	75.4567	0.498956
11	0.377923	75.4464	0.499013
11.1	0.382	75.4259	0.499069
11.2	0.386078	75.3952	0.499126
11.3	0.390156	75.3543	0.499184
11.4	0.394235	75.3033	0.499242
11.5	0.398315	75.2425	0.499301
11.6	0.402395	75.172	0.49936
11.7	0.406476	75.092	0.499419
11.8	0.410557	75.0025	0.499479
11.9	0.414639	74.9036	0.499539
12	0.418722	74.7954	0.4996
12.1	0.422805	74.678	0.499661
12.2	0.426889	74.5514	0.499723
12.3	0.430973	74.4159	0.499785
12.4	0.435058	74.2716	0.499848
12.5	0.439144	74.1191	0.499911
12.6	0.44323	73.9589	0.499974
12.7	0.447317	73.7913	0.500038
12.8	0.451404	73.617	0.500102
12.9	0.455492	73.4369	0.500167
13	0.459581	73.2517	0.500231
13.1	0.46367	73.0623	0.500297
13.2	0.46776	72.8693	0.500362
13.3	0.47185	72.6734	0.500429
13.4	0.475941	72.4752	0.500495
13.5	0.480032	72.2755	0.500562
13.6	0.484124	72.0747	0.500629
13.7	0.488216	71.8736	0.500696
13.8	0.492308	71.6729	0.500764
13.9	0.496401	71.4733	0.500832
14	0.500494	71.2755	0.500901
14.1	0.504587	71.0804	0.500969
14.2	0.508681	70.889	0.501038
14.3	0.512775	70.7021	0.501108
14.4	0.51687	70.5208	0.501177
14.5	0.520964	70.3461	0.501247
14.6	0.525059	70.1788	0.501317
14.7	0.529154	70.0196	0.501388
14.8	0.533249	69.8689	0.501459
14.9	0.537344	69.7273	0.50153
15	0.54144	69.5955	0.501601
15.1	0.545535	69.4737	0.501672
15.2	0.549631	69.3625	0.501744
15.3	0.553727	69.2621	0.501816
15.4	0.557823	69.1725	0.501888
15.5	0.561919	69.0936	0.50196
15.6	0.566015	69.0255	0.502033
15.7	0.570111	68.9679	0.502105
15.8	0.574208	68.9207	0.502178
15.9	0.578304	68.8837	0.502251
16	0.582401	68.8566	0.502324
16.1	0.586497	68.8391	0.502398
16.2	0.590594	68.8308	0.502471
16.3	0.59469	68.8311	0.502545
16.4	0.598787	68.8395	0.502619
16.5	0.602884	68.8554	0.502693
16.6	0.606981	68.8783	0.502767
16.7	0.611078	68.9079	0.502841
16.8	0.615174	68.9435	0.502916
16.9	0.619271	68.9845	0.50299
17	0.623368	69.0305	0.503065
17.1	0.627465	69.0808	0.503139
17.2	0.631562	69.1349	0.503214
17.3	0.635659	69.192	0.503289
17.4	0.639756	69.2519	0.503364
17.5	0.643853	69.3144	0.503439
17.6	0.64795	69.3792	0.503514
17.7	0.652047	69.4464	0.503589
17.8	0.656144	69.5158	0.503664
17.9	0.660241	69.5875	0.503739
18	0.664338	69.6611	0.503814
18.1	0.668435	69.7364	0.50389
18.2	0.672532	69.8133	0.503965
18.3	0.676629	69.8916	0.50404
18.4	0.680726	69.9709	0.504115
18.5	0.684822	70.0509	0.504191
18.6	0.688919	70.1313	0.504266
18.7	0.693016	70.2118	0.504342
18.8	0.697113	70.2921	0.504417
18.9	0.70121	70.3724	0.504492
19	0.705307	70.4526	0.504568

[truncated: 15 more sheets: Ferritin_M, FSH_F, FSH_M, HDL_F, HDL_M, Iron_F, Iron_M, LH_F, LH_M, Testosterone_F, Testosterone_M, TG, Vit B12, VitD, Codes]
